# Supplementary material for: Dynamic change and spatial distribution of HIV-1 CRF119_0107 transmission clusters from 2019 to 2024 in Nanjing, China: a genomic and spatial epidemiological analysis
Source: Research Square preprint supplement (doi:10.21203/rs.3.rs-6539216/v1), 2025-07-14
Supplement: Supplementary file 1 [file 9e4178495c734c74f29304e8.docx]

Table S1 The Genbase accession numbers of all the 138 sequences in this study

| sid | Genbase |
| --- | --- |
| nj2019008 | C_AA055244.1 |
| nj2019020 | C_AA055256.1 |
| nj2019057 | C_AA055293.1 |
| nj2019061 | C_AA055297.1 |
| nj2019183 | C_AA055419.1 |
| nj2019216 | C_AA055452.1 |
| nj2019225 | C_AA055461.1 |
| nj2019291 | C_AA055527.1 |
| nj2019294 | C_AA055530.1 |
| nj2019309 | C_AA055545.1 |
| nj2019330 | C_AA055566.1 |
| nj2019345 | C_AA055581.1 |
| nj2019348 | C_AA055584.1 |
| nj2020016 | C_AA055601.1 |
| nj2020024 | C_AA055609.1 |
| nj2020032 | C_AA055617.1 |
| nj2020045 | C_AA055630.1 |
| nj2020107 | C_AA055692.1 |
| nj2020109 | C_AA055694.1 |
| nj2020111 | C_AA055696.1 |
| nj2020122 | C_AA055707.1 |
| nj2020124 | C_AA055709.1 |
| nj2020132 | C_AA055717.1 |
| nj2020153 | C_AA055738.1 |
| nj2020173 | C_AA055758.1 |
| nj2020174 | C_AA055759.1 |
| nj2020201 | C_AA055786.1 |
| nj2020205 | C_AA055790.1 |
| nj2020247 | C_AA055832.1 |
| nj2020250 | C_AA055835.1 |
| nj2020264 | C_AA055849.1 |
| nj2020266 | C_AA055851.1 |
| nj2020269 | C_AA055854.1 |
| nj2020277 | C_AA055862.1 |
| nj2020278 | C_AA055863.1 |
| nj2021011 | C_AA055907.1 |
| nj2021024 | C_AA055920.1 |
| nj2021031 | C_AA055927.1 |
| nj2021050 | C_AA055946.1 |
| nj2021051 | C_AA055947.1 |
| nj2021081 | C_AA055977.1 |
| nj2021089 | C_AA055985.1 |
| nj2021091 | C_AA055987.1 |
| nj2021101 | C_AA055997.1 |
| nj2021102 | C_AA055998.1 |
| nj2021106 | C_AA056002.1 |
| nj2021132 | C_AA056028.1 |
| nj2021146 | C_AA056042.1 |
| nj2021147 | C_AA056043.1 |
| nj2021153 | C_AA056049.1 |
| nj2021170 | C_AA056065.1 |
| nj2021182 | C_AA056077.1 |
| nj2021184 | C_AA056079.1 |
| nj2021227 | C_AA056122.1 |
| nj2021260 | C_AA056155.1 |
| nj2021269 | C_AA056164.1 |
| nj2021277 | C_AA056172.1 |
| nj2021294 | C_AA056189.1 |
| nj2021311 | C_AA056206.1 |
| nj2021313 | C_AA056208.1 |
| nj2021320 | C_AA056215.1 |
| nj2021324 | C_AA056219.1 |
| nj2021325 | C_AA056220.1 |
| nj2021337 | C_AA056232.1 |
| nj2021338 | C_AA056233.1 |
| nj2021380 | C_AA056275.1 |
| nj2021391 | C_AA056286.1 |
| nj2021398 | C_AA056293.1 |
| nj2021442 | C_AA056337.1 |
| nj2021451 | C_AA056346.1 |
| nj2021496 | C_AA056391.1 |
| nj2021499 | C_AA056394.1 |
| nj2021500 | C_AA056395.1 |
| nj2022008 | C_AA073845.1 |
| nj2022022 | C_AA073859.1 |
| nj2022043 | C_AA073880.1 |
| nj2022045 | C_AA073882.1 |
| nj2022062 | C_AA073899.1 |
| nj2022112 | C_AA073949.1 |
| nj2022113 | C_AA073950.1 |
| nj2022133 | C_AA073970.1 |
| nj2022153 | C_AA073990.1 |
| nj2022159 | C_AA073996.1 |
| nj2022204 | C_AA074038.1 |
| nj2022206 | C_AA074040.1 |
| nj2022221 | C_AA074052.1 |
| nj2022222 | C_AA074053.1 |
| nj2022225 | C_AA074056.1 |
| nj2022239 | C_AA074068.1 |
| nj2022261 | C_AA074089.1 |
| nj2022315 | C_AA074143.1 |
| nj2022342 | C_AA074169.1 |
| nj2022344 | C_AA074171.1 |
| nj2022374 | C_AA074201.1 |
| nj2022377 | C_AA074204.1 |
| nj2022401 | C_AA074228.1 |
| nj2022422 | C_AA074249.1 |
| nj2022427 | C_AA074253.1 |
| nj2022434 | C_AA074260.1 |
| nj2022435 | C_AA074261.1 |
| nj2022463 | C_AA074289.1 |
| nj2022560 | C_AA074379.1 |
| nj2022569 | C_AA074388.1 |
| nj2023A010 | C_AA074824.1 |
| nj2023A015 | C_AA074885.1 |
| nj2023A059 | C_AA074862.1 |
| nj2023A061 | C_AA074893.1 |
| nj2023B022 | C_AA074770.1 |
| nj2023B066 | C_AA074796.1 |
| nj2023B090 | C_AA074808.1 |
| nj2023B102 | C_AA074816.1 |
| nj2023B105 | C_AA074919.1 |
| nj2023B116 | C_AA074926.1 |
| nj2023B126 | C_AA074485.1 |
| nj2023C040 | C_AA074463.1 |
| nj2023C060 | C_AA074555.1 |
| nj2023C123 | C_AA074600.1 |
| nj2023C124 | C_AA074601.1 |
| nj2023D010 | C_AA074630.1 |
| nj2023D020 | C_AA074660.1 |
| nj2023D069 | C_AA074696.1 |
| nj2024A018 | C_AA105259.1 |
| nj2024A058 | C_AA105226.1 |
| nj2024A065 | C_AA105233.1 |
| nj2024B001 | C_AA105276.1 |
| nj2024B005 | C_AA105289.1 |
| nj2024B014 | C_AA105314.1 |
| nj2024B030 | C_AA105338.1 |
| nj2024B104 | C_AA105356.1 |
| nj2024B105 | C_AA105357.1 |
| nj2024B106 | C_AA105369.1 |
| nj2024B107 | C_AA105370.1 |
| nj2024C069 | C_AA105503.1 |
| nj2024C126 | C_AA105560.1 |
| nj2024D008 | C_AA105584.1 |
| nj2024D029 | C_AA105605.1 |
| nj2024D036 | C_AA105611.1 |
| nj2024D106 | C_AA105680.1 |
