# Supplementary material for: Dynamic change and spatial distribution of HIV-1 CRF119_0107 transmission clusters from 2019 to 2024 in Nanjing, China: a genomic and spatial epidemiological analysis
Source: Research Square preprint supplement (doi:10.21203/rs.3.rs-6539216/v1), 2025-07-14
Supplement: Supplementary file 2 [file feb05ed7218d625a8413760b.docx]

**Figure S1 Sensitivity analysis graph of genetic distance thresholds.** The optimal GD threshold was determined as 0.005 substitutions/site, which identified the highest number of clusters in the molecular networks.
